# Supplementary material for: Oral-Health-Related Quality of Life in Adult Patients with Rheumatic Diseases—A Systematic Review
Source: PubMed Central journal article supplement (PMC7231140; doi:10.3390/jcm9041172), 2020-04-19
Supplement: jcm-09-01172-s001.pdf [file jcm-09-01172-s001.pdf]

**Table S1.** Excluded studies during the evaluation process with reasons for exclusion.

| Author and year                | Issue of examination                                                                                     | Reason for exclusion                                                                                          |
|--------------------------------|----------------------------------------------------------------------------------------------------------|---------------------------------------------------------------------------------------------------------------|
| John <i>et al.</i> 2007        | OHRQoL of patients with temporomandibular disorders                                                      | No examination of patients with rheumatic diseases                                                            |
| Rener-Sitar <i>et al.</i> 2008 | OHRQoL of patients with craniomandibular disorders                                                       | No examination of patients with rheumatic diseases                                                            |
| Larsson 2010                   | Evaluation of OHRQoL assessment tools in Swedish population                                              | No examination of patients with rheumatic diseases                                                            |
| Rener-Sitar <i>et al.</i> 2013 | Impact of temporomandibular disorders on OHRQoL                                                          | No examination of patients with rheumatic diseases                                                            |
| Su <i>et al.</i> 2014          | Influence of hyaluronic acid injection on OHRQoL of patients with temporomandibular joint osteoarthritis | No examination of patients with rheumatic diseases (osteoarthritis restricted to the temporomandibular joint) |
| Ahola <i>et al.</i> 2015       | OHRQoL of patients with rheumatic diseases                                                               | No verified diagnosis of rheumatic diseases (survey via mail)                                                 |
| Santos <i>et al.</i> 2015      | OHRQoL of patients with idiopathic juvenile arthritis                                                    | Age < 18 years                                                                                                |
| Su <i>et al.</i> 2016          | OHRQoL of patients with temporomandibular joint osteoarthritis                                           | No examination of patients with rheumatic diseases (osteoarthritis restricted to the temporomandibular joint) |
| Su <i>et al.</i> 2018          | OHRQoL of patients with temporomandibular joint osteoarthritis                                           | No examination of patients with rheumatic diseases (osteoarthritis restricted to the temporomandibular joint) |
| Rahimi <i>et al.</i> 2018      | OHRQoL of patients with idiopathic juvenile arthritis                                                    | Age < 18 years                                                                                                |
| Isola <i>et al.</i> 2019       | OHRQoL of patients with idiopathic juvenile arthritis                                                    | Age < 18 years                                                                                                |
| Su <i>et al.</i> 2019          | OHRQoL of patients with temporomandibular joint osteoarthritis                                           | No examination of patients with rheumatic diseases (osteoarthritis restricted to the temporomandibular joint) |
| Bucci <i>et al.</i> 2019       | OHRQoL of patients with idiopathic juvenile arthritis                                                    | Age < 18 years                                                                                                |

OHRQoL: oral health-related quality of life

Supplementary table S1 References:

1. John, M.T., Reissmann, D.R., Schierz, O., Wassell, R.W. Oral health-related quality of life in patients with temporomandibular disorders. *J Orofac Pain.* 2007, 21, 46-54.
2. Rener-Sitar, K., Celebić, A., Stipetić, J., Marion, L., Petricević, N., Zaletel-Kragelj, L. Oral health related quality of life in Slovenian patients with craniomandibular disorders. *Coll Antropol.* 2008, 32, 513-517.
3. Larsson, P. Methodological studies of orofacial aesthetics, orofacial function and oral health-related quality of life. *Swed Dent J Suppl.* 2010, 11-98.
4. Rener-Sitar, K., Celebić, A., Mehulić, K., Petricević, N. Factors related to oral health related quality of life in TMD patients. *Coll Antropol.* 2013, 37, 407-413.
5. Su, N., Yang, X., Liu, Y., Huang, Y., Shi, Z. Evaluation of arthrocentesis with hyaluronic acid injection plus oral glucosamine hydrochloride for temporomandibular joint osteoarthritis in oral-health-related quality of life. *J Craniomaxillofac Surg.* 2014, 42(6), 846-851.
6. Ahola, K., Saarinen, A., Kuuliala, A., Leirisalo-Repo, M., Murtomaa, H., Meurman, J.H. Impact of rheumatic diseases on oral health and quality of life. *Oral Dis.* 2015, 21, 342-348.

7. Santos, D., Silva, C., Silva, M. Oral health and quality of life of children and adolescents with juvenile idiopathic arthritis according to their caregivers' perceptions. *Spec Care Dentist*. 2015, 35, 272-278.
8. Su, N., Liu, Y., Yang, X., Shen, J., Wang, H. Correlation between oral health-related quality of life and clinical dysfunction index in patients with temporomandibular joint osteoarthritis. *J Oral Sci*. 2016, 58, 483-490.
9. Su, N., Liu, Y., Yang, X., Shen, J., Wang, H. Association of malocclusion, self-reported bruxism and chewing-side preference with oral health-related quality of life in patients with temporomandibular joint osteoarthritis. *Int Dent J*. 2018, 68, 97-104.
10. Rahimi, H., Twilt, M., Herlin, T., Spiegel, L., Pedersen, T.K., Küseler, A., Stoustrup, P. Orofacial symptoms and oral health-related quality of life in juvenile idiopathic arthritis: a two-year prospective observational study. *Pediatr Rheumatol Online J*. 2018, 16, 47.
11. Isola, G., Perillo, L., Migliorati, M., Matarese, M., Dalessandri, D., Grassia, V., Alibrandi, A., Matarese, G. The impact of temporomandibular joint arthritis on functional disability and global health in patients with juvenile idiopathic arthritis. *Eur J Orthod*. 2019, 41, 117-124.
12. Su, N., Wang, H., van Wijk, A.J., Visscher, C.M., Lobbezoo, F., Shi, Z., van der Heijden, G.J.M.G. Prediction Models for Oral Health-Related Quality of Life in Patients with Temporomandibular Joint Osteoarthritis 1 and 6 Months After Arthrocentesis with Hyaluronic Acid Injections. *J Oral Facial Pain Headache*. 2019, 33, 54–66.
13. Bucci, R., Rongo, R., Amato, A., Martina, S., D'Antò, V., Valletta, R. The Psychological Impact of Dental Aesthetics in Patients with Juvenile Idiopathic Arthritis Compared with Healthy Peers: A Cross-Sectional Study. *Dent J (Basel)*. 2019, 7(4).

**Table S2.** Oral health parameters that were examined related to OHRQoL in the included studies.

| Author, year                       | Dental paramers                                                                        | Periodontal parameters         | Other oral health parameters              |
|------------------------------------|----------------------------------------------------------------------------------------|--------------------------------|-------------------------------------------|
| <b>Rheumatoid arthritis</b>        |                                                                                        |                                |                                           |
| Blaizot et al. 2013 [9]            | number of teeth, need for conservative dental treatment, need for prosthetic treatment | need for periodontal treatment | no                                        |
| Mühlberg et al. 2017 [13]          | DMF-T                                                                                  | periodontal disease severity   | no                                        |
| Chamani et al. 2017 [14]           | DMF-T, denture wearing                                                                 | no                             | xerostomia                                |
| Tristiu et al. 2018 [15]           | tooth loss, denture wearing                                                            | periodontitis severity         | no                                        |
| de Azevedo Branco et al. 2019 [11] | DMF-T, M-T, denture wearing                                                            | presence of periodontitis      | stimulated and unstimulated salivary flow |
| Nosratzahi et al. 2019 [16]        | no                                                                                     | no                             | no                                        |
| Schmalz et al. 2020 [17]           | dental treatment need, M-T                                                             | no                             | no                                        |
| <b>Systemic sclerosis</b>          |                                                                                        |                                |                                           |
| Maddali Bongi et al. 2012 [10]     | no                                                                                     | no                             | mouth opening                             |
| Yuen et al. 2014 [19]              | no                                                                                     | no                             | no                                        |

|                                           |                                                                                   |                                                                        |                                                                |
|-------------------------------------------|-----------------------------------------------------------------------------------|------------------------------------------------------------------------|----------------------------------------------------------------|
| Baron et al. 2014<br>[20]                 | D-T, F-T, M-T                                                                     | number of teeth with<br>probing depth >3mm or<br>CAL ≥5.5              | interincisal distance,<br>salivary flow                        |
| Baron et al. 2015<br>[21]                 | no                                                                                | no                                                                     | no                                                             |
| Parat et al. 2018<br>[22]                 | no                                                                                | no                                                                     | no                                                             |
| <b>Sjögren Syndrome</b>                   |                                                                                   |                                                                        |                                                                |
| McMillan et al.<br>2004 [23]              | no                                                                                | no                                                                     | no                                                             |
| Azuma et al. 2014<br>[24]                 | no                                                                                | no                                                                     | salivary flow, salivary<br>level of epidermal growth<br>factor |
| Azuma et al. 2015<br>[25]                 | no                                                                                | no                                                                     | salivary level of epidermal<br>growth factor                   |
| Rusthen et al.<br>2017 [26]               | no                                                                                | no                                                                     | stimulated and<br>unstimulated salivary<br>flow                |
| Nesvold et al.<br>2018 [27]               | no                                                                                | no                                                                     | stimulated and<br>unstimulated salivary<br>flow                |
| Amaral et al. 2018<br>[28]                | no                                                                                | no                                                                     | stimulated and<br>unstimulated salivary<br>flow                |
| Fernandez-<br>Martinez et al.<br>2019 [8] | no                                                                                | no                                                                     | unstimulated salivary<br>flow                                  |
| daMata et al. 2019<br>[29]                | denture wearing                                                                   | periodontal status                                                     | salivary output                                                |
| <b>Behcet's disease</b>                   |                                                                                   |                                                                        |                                                                |
| Mumcu et al. 2006<br>[30]                 | number of teeth                                                                   | no                                                                     | oral aphthous ulcers                                           |
| Mumcu et al. 2007<br>[31]                 | extracted teeth                                                                   | no                                                                     | oral aphthous ulcers                                           |
| Mumcu et al. 2009<br>[32]                 | carious teeth, extracted teeth, filled<br>teeth, number of teeth, Plaque<br>index | gingival index, Sulcus<br>bleeding index, clinical<br>attachment level | oral aphthous ulcers                                           |
| Naito et al. 2014<br>[33]                 | no                                                                                | no                                                                     | oral aphthous ulcers                                           |
| <b>Systemic lupus erythematosus</b>       |                                                                                   |                                                                        |                                                                |
| Correa et al. 2018<br>[34]                | DMF-T, D-T, F-T, M-T, denture<br>wearing                                          | presence of periodontitis                                              | stimulated and<br>unstimulated salivary<br>flow                |
| <b>Ankylosing Spondylitis</b>             |                                                                                   |                                                                        |                                                                |
| Schmalz et al.<br>2018 [12]               | DMF-T, D-T, M-T                                                                   | periodontal disease severity                                           | no                                                             |

DMF-T: decayed-, missing- and filled teeth index, D-T: number of decayed teeth, F-T: number of filled teeth, M-T: number of missing teeth, CAL: clinical attachment loss.
